# Supplementary material for: Comparative study on arsenate removal mechanism of MgO and MgO/TiO2 composites: FTIR and XPS analysis
Source: Royal Society of Chemistry journal article supplement (doi:10.1039/c5nj02358k), 2016-01-01
Supplement: c5nj02358k1.pdf [file c5nj02358k1.pdf]

## Supporting information for

# Comparative study on arsenate removal mechanism of MgO and MgO/TiO<sub>2</sub> composites: FTIR and XPS analysis

Pei-Yun Wu<sup>a</sup>, Yin-Ping Jiang<sup>a</sup>, Qun-Ying Zhang<sup>a</sup>, Yong Jia<sup>\*a</sup>,

Dai-Yin Peng<sup>a</sup>, Wei Xu<sup>\*b</sup>

<sup>a</sup>Department of Pharmacy, Anhui University of Chinese Medicine, Hefei 230012, PR

China

<sup>b</sup>Key Lab of Material Physics, Institute of Solid State Physics, Hefei 230031, PR

China

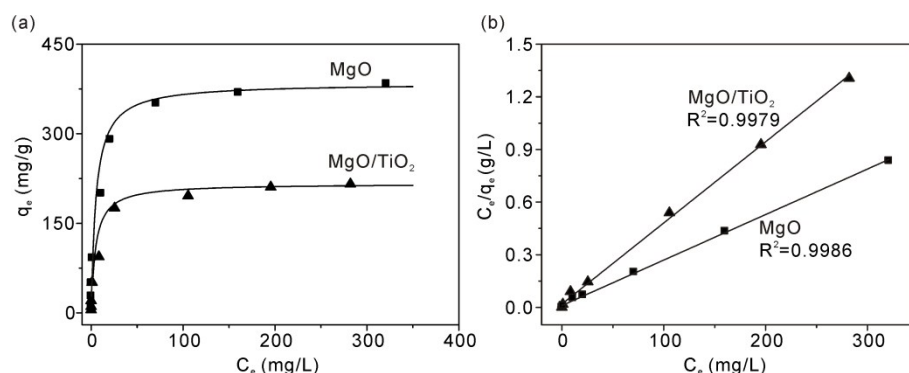

**Fig. S1** Adsorption isotherms (a) and linearized Langmuir isotherms (b) obtained from As(V) adsorption onto the MgO nanowires and MgO/TiO<sub>2</sub> composites.

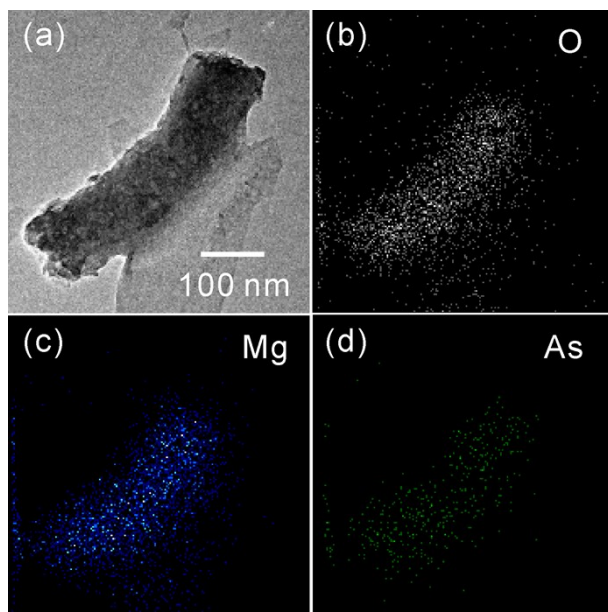

**Fig. S2** TEM image (a) and elemental mapping images (b–d) of the MgO nanowires after As(V) adsorption.

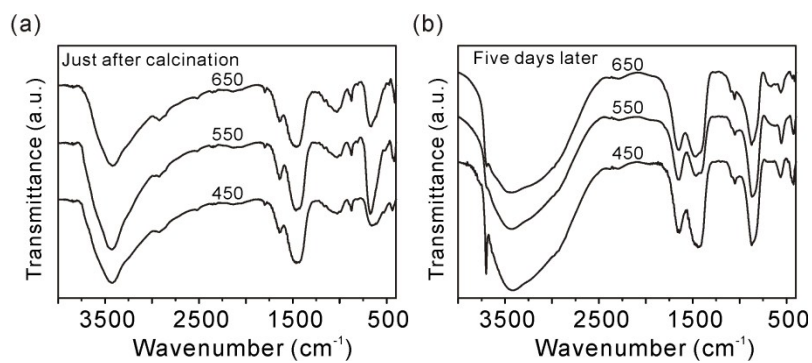

**Fig. S3** FTIR spectra of the MgO nanowires just after calcination at different temperature (a) and after stored five days later (b).

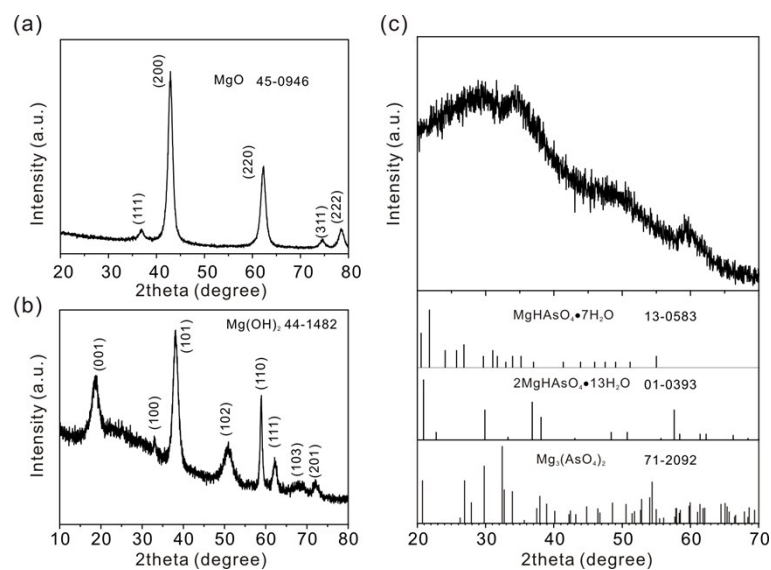

**Fig. S4** XRD patterns of the MgO nanowires before (a) and after after immersing in water for 24 hours (b), and MgO nanowires after As (V) adsorption (c) with a initial As(V) concentration of 500 mg L<sup>-1</sup>.

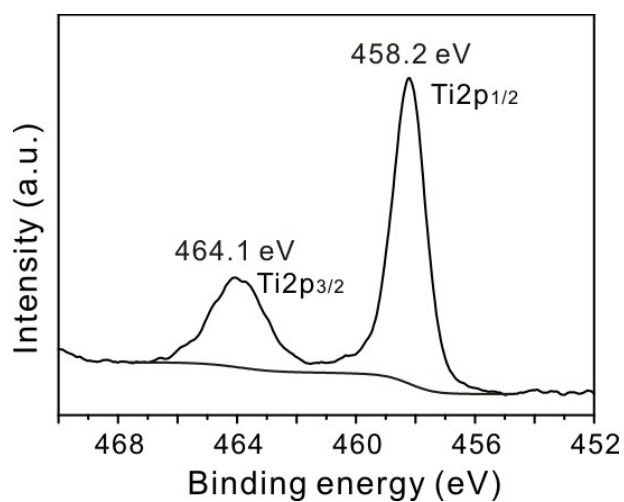

**Fig. S5** XPS Ti2p spectrum of MgO/TiO<sub>2</sub> composites after As(V) adsorption.
